# Supplementary material
Source: HighWire-hosted journal article supplement (https://gut.bmj.com/content/70/6/1044)
Supplement: inline-supplementary-material-1 [file inline-supplementary-material-1.pdf]

**Supplementary Table 1: RAND Panel members**

| RAND Panellists           | Affiliation                                                                                                                                                                                       |
|---------------------------|---------------------------------------------------------------------------------------------------------------------------------------------------------------------------------------------------|
| <b>Richard Hansen</b>     | Department of Paediatric Gastroenterology, Royal Hospital for Children, Glasgow, UK                                                                                                               |
| <b>R Mark Beattie</b>     | Department of Paediatric Gastroenterology, Southampton Children's Hospital, Southampton, UK                                                                                                       |
| <b>Marcus Auth</b>        | Department of Paediatric Gastroenterology, Alder Hey Children's NHS Foundation Trust, Liverpool and University of Liverpool, UK                                                                   |
| <b>Nick Croft</b>         | Blizard Institute, Barts and the London School of Medicine, Queen Mary University of London and Paediatric Gastroenterology, Royal London Children's Hospital, Barts Health NHS Trust, London, UK |
| <b>David Devadason</b>    | Department of Paediatric Gastroenterology, Nottingham Children's Hospital, Queen's Medical Centre, Nottingham, UK                                                                                 |
| <b>Jenny Epstein</b>      | Department of Paediatric Gastroenterology, Chelsea and Westminster Hospital NHS Foundation Trust, London, UK                                                                                      |
| <b>Lucy Howarth</b>       | Department of Paediatric Gastroenterology, John Radcliffe Hospital, Oxford University Hospitals NHS Foundation Trust, Oxford, UK                                                                  |
| <b>Fevronia Kiparissi</b> | Department of Paediatric Gastroenterology, Great Ormond Street Hospital, London, UK                                                                                                               |
| <b>Rafeeq Muhammed</b>    | Department of Paediatric Gastroenterology, Birmingham Women's and Children's NHS Foundation Trust, Birmingham, UK                                                                                 |
| <b>Christine Spray</b>    | Department of Paediatric Gastroenterology, Bristol Royal Hospital for Children, Bristol, UK                                                                                                       |
| <b>Franco Torrente</b>    | Department of Paediatric Gastroenterology, Addenbrooke's Hospital, Cambridge, UK                                                                                                                  |
| <b>Arun Urs</b>           | Department of Paediatric Gastroenterology, Sheffield Children's Hospital NHS Foundation Trust, Sheffield, UK                                                                                      |
| <b>David C Wilson</b>     | Child Life and Health, University of Edinburgh, Edinburgh, UK; Department of Paediatric Gastroenterology and Nutrition, Royal Hospital for Sick Children, Edinburgh, UK                           |
| <b>Jochen Kammermeier</b> | Department of Paediatric Gastroenterology, Evelina London Children's Hospital, London, UK                                                                                                         |

## Conflicts of interest:

No COIs: AU, FT, RMB, SM, DD, LH, VS, PD, CD, RM, CS, FK, MS and JK

MAS: Served as a speaker, a consultant and/or an advisory board member for Sandoz, Janssen, Takeda, MSD, Falk, Samsung Bioepis.

PMI: AbbVie, Celgene, Falk Pharma, Ferring MSD, Janssen, Pfizer, Takeda, Tillotts, Sandoz, Shire, Warner Chilcott - Speaking/education, intermittent (last 3 years); MSC Pfizer, Takeda - Research, intermittent (last 3 years); AbbVie, Arena, Genentech, Gilead, Hospira, Janssen, Lilly, MSD, Pfizer, Pharmacosmos, Prometheus, Roche, Sandoz Samsung Bioepis, Takeda, Topivert, VH2, Vifor Pharma - Advisory fees, intermittent (last 3 years).

RH: consultancy fees/speaker's fees/travel support from Nutricia and 4D pharma.

MA: Travel grants received from Nutricia and AbbVie. Previous member of advisory panel for AbbVie. Personal fees received from Dr Falk Pharma.

JE: Sponsorship from Falk, Nutricia and Abbvie to attend national and international meetings. Participation in medical advisory panels for Falk and Nutricia. Lecture fee received for Falk.

NC: Abbvie, Shire, Takeda, Pfizer, Janssen – funding to authors' institution for IBD trials.

DCW: Rreceived consultancy fees, speaker fees and/or travel support from Abbvie, Nestle Health Sciences, Roche, Ferring and Predictimmune.

## Acknowledgements:

RH is supported by an NHS Research Scotland Career Researcher Fellowship.
