# Supplementary material
Source: HighWire-hosted journal article supplement (https://gut.bmj.com/content/70/6/1044)
Supplement: inline-supplementary-material-2 [file inline-supplementary-material-2.pdf]

**Supplementary Table 2.** Final Assessment of Statements by RAND Panel: Appropriateness of management in paediatric acute severe colitis (ASC) in the context of the COVID-19 pandemic. \*Denotes questions where all panelists voted the same appropriateness category as the final outcome category (i.e. level of appropriateness was agreed unanimously). ♦Denotes disagreement index >1.

| 91 Statements                                                                                                                                                                                                      | Median | Disagreement Index | Standard Deviation | Category      |
|--------------------------------------------------------------------------------------------------------------------------------------------------------------------------------------------------------------------|--------|--------------------|--------------------|---------------|
| <b>Admission</b>                                                                                                                                                                                                   |        |                    |                    |               |
| <b>All patients admitted with ASUC</b>                                                                                                                                                                             |        |                    |                    |               |
| Perform a SARS-CoV-2 swab on admission                                                                                                                                                                             | 9*     | 0.24               | 0.55               | Appropriate   |
| Perform a chest X-ray within 24 hours of admission                                                                                                                                                                 | 3.5    | 0.18               | 1.85               | Uncertain     |
| Isolate them in a side room throughout their admission regardless of COVID status                                                                                                                                  | 8      | 0.01               | 1.56               | Appropriate   |
| Expedite pathway timings with early biologic screen on admission.                                                                                                                                                  | 8      | 0.24               | 0.80               | Appropriate   |
| <b>Perform a flexible sigmoidoscopy</b>                                                                                                                                                                            |        |                    |                    |               |
| Within 24 hours of admission in all patients admitted with ASUC (as per BSG guidance)                                                                                                                              | 3      | 0.00               | 0.76               | Inappropriate |
| In all patients failing IV corticosteroids who have not had a flexible sigmoidoscopy on admission                                                                                                                  | 7*     | 0.16               | 0.78               | Appropriate   |
| In all patients failing intravenous corticosteroid therapy who have already had a flexible sigmoidoscopy on admission                                                                                              | 3      | 0.04               | 1.32               | Inappropriate |
| In all patients being referred for colectomy who have not had a flexible sigmoidoscopy on admission, to confirm the diagnosis prior to surgery (excluding patients who have toxic megacolon or perforation)        | 8.5    | 0.13               | 1.14               | Appropriate   |
| In all patients being referred for colectomy who have already had a flexible sigmoidoscopy on admission, to assess the degree of ongoing inflammation (excluding patients who have toxic megacolon or perforation) | 3      | 0.24               | 1.52               | Inappropriate |
| <b>First line medical therapy</b>                                                                                                                                                                                  |        |                    |                    |               |
| <b>Negative swab and no symptoms or signs of COVID-19 infection</b>                                                                                                                                                |        |                    |                    |               |

|                                                                                                                                                   |     |      |      |               |
|---------------------------------------------------------------------------------------------------------------------------------------------------|-----|------|------|---------------|
| Follow standard ECCO/ESPGHAN guidelines and start intravenous methylprednisolone daily as an inpatient                                            | 9*  | 0.00 | 0.28 | Appropriate   |
| Start IV methylprednisolone daily as an outpatient                                                                                                | 1*  | 0.00 | 0.77 | Inappropriate |
| Start budesonide/beclometasone daily as an inpatient                                                                                              | 1*  | 0.00 | 0.28 | Inappropriate |
| Start IV steroids concurrently with infliximab                                                                                                    | 2*  | 0.13 | 0.75 | Inappropriate |
| Start infliximab without steroids                                                                                                                 | 2*  | 0.15 | 0.86 | Inappropriate |
| Start IV steroids concurrently with ciclosporin                                                                                                   | 1.5 | 0.13 | 0.95 | Inappropriate |
| Start ciclosporin and discontinue steroids                                                                                                        | 1*  | 0.00 | 0.60 | Inappropriate |
| Start IV steroids concurrently with tacrolimus                                                                                                    | 1*  | 0.13 | 0.65 | Inappropriate |
| Start IV steroids and discontinue tacrolimus                                                                                                      | 1*  | 0.01 | 0.78 | Inappropriate |
| Start oral "MADoV" antibiotic combination alongside immunosuppressive therapy (metronidazole, amoxicillin, doxycycline, vancomycin or equivalent) | 3   | 0.65 | 1.93 | Inappropriate |
| Start oral "MADoV" antibiotic combination alone (metronidazole, amoxicillin, doxycycline, vancomycin or equivalent)                               | 2   | 0.18 | 0.99 | Inappropriate |
| Start prophylactic anticoagulation                                                                                                                | 7   | 0.40 | 1.50 | Appropriate   |
| Discuss with COVID-19 specialist                                                                                                                  | 3   | 0.52 | 1.77 | Inappropriate |
| <b>Positive swab but no symptoms or signs of COVID-19 infection</b>                                                                               |     |      |      |               |
| Follow standard ECCO/ESPGHAN guidelines and start intravenous methylprednisolone daily as an inpatient                                            | 8*  | 0.13 | 0.73 | Appropriate   |
| Start IV methylprednisolone daily as an outpatient                                                                                                | 1*  | 0.00 | 0.00 | Inappropriate |
| Start budesonide/beclometasone daily as an inpatient                                                                                              | 1*  | 0.00 | 0.60 | Inappropriate |
| Start IV steroids concurrently with infliximab                                                                                                    | 1   | 0.13 | 1.48 | Inappropriate |
| Start infliximab without steroids                                                                                                                 | 2   | 0.29 | 1.39 | Inappropriate |
| Start IV steroids concurrently with ciclosporin                                                                                                   | 1   | 0.13 | 0.96 | Inappropriate |

|                                                                                                                                                   |      |      |      |               |
|---------------------------------------------------------------------------------------------------------------------------------------------------|------|------|------|---------------|
| Start ciclosporin and discontinue steroids                                                                                                        | 1*   | 0.00 | 0.44 | Inappropriate |
| Start IV steroids concurrently with tacrolimus                                                                                                    | 1*   | 0.01 | 0.44 | Inappropriate |
| Start IV steroids and discontinue tacrolimus                                                                                                      | 1*   | 0.00 | 0.38 | Inappropriate |
| Start oral "MADoV" antibiotic combination alongside immunosuppressive therapy (metronidazole, amoxicillin, doxycycline, vancomycin or equivalent) | 4.5  | 0.57 | 1.89 | Uncertain     |
| Start oral "MADoV" antibiotic combination alone (metronidazole, amoxicillin, doxycycline, vancomycin or equivalent)                               | 2    | 0.15 | 1.76 | Inappropriate |
| Start prophylactic anticoagulation                                                                                                                | 8    | 0.31 | 1.39 | Appropriate   |
| Discuss with COVID-19 specialist                                                                                                                  | 8.5* | 0.29 | 1.08 | Appropriate   |
| <b>Positive swab with symptoms or signs of COVID-19 infection</b>                                                                                 |      |      |      |               |
| Follow standard ECCO/ESPGHAN guidelines and start intravenous methylprednisolone daily as an inpatient                                            | 7    | 0.16 | 1.13 | Appropriate   |
| Start IV methylprednisolone daily as an outpatient                                                                                                | 1*   | 0.00 | 0.00 | Inappropriate |
| Start budesonide/beclometasone daily as an inpatient                                                                                              | 1*   | 0.00 | 0.63 | Inappropriate |
| Start IV steroids concurrently with infliximab                                                                                                    | 1.5  | 0.29 | 1.38 | Inappropriate |
| Start infliximab without steroids                                                                                                                 | 3    | 0.52 | 1.56 | Inappropriate |
| Start IV steroids concurrently with ciclosporin                                                                                                   | 1*   | 0.13 | 0.65 | Inappropriate |
| Start ciclosporin and discontinue steroids                                                                                                        | 1*   | 0.00 | 0.38 | Inappropriate |
| Start IV steroids concurrently with tacrolimus                                                                                                    | 1*   | 0.13 | 0.65 | Inappropriate |
| Start IV steroids and discontinue tacrolimus                                                                                                      | 1*   | 0.00 | 0.38 | Inappropriate |
| Start oral "MADoV" antibiotic combination alongside immunosuppressive therapy (metronidazole, amoxicillin, doxycycline, vancomycin or equivalent) | 5    | 0.56 | 2.06 | Uncertain     |
| Start oral "MADoV" antibiotic combination alone (metronidazole, amoxicillin, doxycycline, vancomycin or equivalent)                               | 2    | 0.31 | 1.80 | Inappropriate |
| Start prophylactic anticoagulation                                                                                                                | 8*   | 0.29 | 0.91 | Appropriate   |
| Discuss with COVID-19 specialist                                                                                                                  | 9*   | 0.00 | 0.38 | Appropriate   |
| <b>Management at day 5: Investigations</b>                                                                                                        |      |      |      |               |

|                                                                                                                                                                               |      |      |      |               |
|-------------------------------------------------------------------------------------------------------------------------------------------------------------------------------|------|------|------|---------------|
| Repeat a SARS-CoV-2 swab in patients with a negative first swab                                                                                                               | 7.5  | 0.18 | 1.86 | Appropriate   |
| Repeat stool test for <i>Clostridium difficile</i> in patients with a negative first sample who, in the context of COVID-19 have been treated with broad spectrum antibiotics | 7    | 0.52 | 2.43 | Appropriate   |
| <b>Patients with a PUCAI 35-65</b>                                                                                                                                            |      |      |      |               |
| <b>Negative swab and no symptoms or signs of COVID-19 infection</b>                                                                                                           |      |      |      |               |
| Follow standard standard guidelines and continue IV steroids for a further 2-5 days.                                                                                          | 8*   | 0.01 | 0.69 | Appropriate   |
| Expedite second line therapy and treat all patients as per the guidelines for patients with a PUCAI>65                                                                        | 4.5  | 0.97 | 2.15 | Uncertain     |
| <b>Positive swab but no symptoms or signs of COVID-19 infection</b>                                                                                                           |      |      |      |               |
| Follow standard standard guidelines and continue IV steroids for a further 2-5 days.                                                                                          | 7    | 0.16 | 1.17 | Appropriate   |
| Expedite second line therapy and treat all patients as per the guidelines for patients with a PUCAI>65                                                                        | 5.5  | 0.97 | 2.34 | Uncertain     |
| <b>Positive swab with symptoms or signs of COVID-19 infection</b>                                                                                                             |      |      |      |               |
| Follow standard standard guidelines and continue IV steroids for a further 2-5 days.                                                                                          | 7    | 0.16 | 1.28 | Appropriate   |
| Expedite second line therapy and treat all patients as per the guidelines for patients with a PUCAI>65                                                                        | 5    | 0.94 | 2.38 | Uncertain     |
| <b>Rescue therapy: PUCAI &gt;65</b>                                                                                                                                           |      |      |      |               |
| <b>Negative swab and no symptoms or signs of COVID-19 infection</b>                                                                                                           |      |      |      |               |
| Continue intravenous steroids alone                                                                                                                                           | 1*   | 0.00 | 0.60 | Inappropriate |
| Start infliximab and continue steroids                                                                                                                                        | 8.5* | 0.13 | 0.52 | Appropriate   |
| Start infliximab and discontinue steroids                                                                                                                                     | 3    | 0.02 | 0.87 | Inappropriate |
| Start ciclosporin and continue steroids                                                                                                                                       | 5.5  | 0.56 | 2.03 | Uncertain     |
| Start ciclosporin and discontinue steroids                                                                                                                                    | 2*   | 0.15 | 0.90 | Inappropriate |
| Start tacrolimus and continue steroids                                                                                                                                        | 2    | 0.29 | 2.15 | Inappropriate |
| Start tacrolimus and discontinue steroids                                                                                                                                     | 1*   | 0.13 | 0.65 | Inappropriate |

|                                                                                                                                                   |     |       |      |               |
|---------------------------------------------------------------------------------------------------------------------------------------------------|-----|-------|------|---------------|
| Start oral "MADoV" antibiotic combination alongside immunosuppressive therapy (metronidazole, amoxicillin, doxycycline, vancomycin or equivalent) | 5   | 0.45  | 2.11 | Uncertain     |
| Start oral "MADoV" antibiotic combination alone (metronidazole, amoxicillin, doxycycline, vancomycin or equivalent)                               | 1*  | 0.29  | 0.95 | Inappropriate |
| Colectomy                                                                                                                                         | 1   | 0.29  | 1.94 | Inappropriate |
| Discuss with COVID-19 specialist                                                                                                                  | 6   | 0.98  | 2.60 | Uncertain     |
| <b>Positive swab but no symptoms or signs of COVID-19 infection</b>                                                                               |     |       |      |               |
| Continue intravenous steroids alone                                                                                                               | 1*  | 0.00  | 0.60 | Inappropriate |
| Start infliximab and continue steroids                                                                                                            | 8*  | 0.01  | 0.71 | Appropriate   |
| Start infliximab and discontinue steroids                                                                                                         | 3   | 0.00  | 1.75 | Inappropriate |
| Start ciclosporin and continue steroids                                                                                                           | 5   | 0.97  | 2.10 | Uncertain     |
| Start ciclosporin and discontinue steroids                                                                                                        | 2*  | 0.13  | 0.65 | Inappropriate |
| Start tacrolimus and continue steroids                                                                                                            | 2   | 0.31  | 1.66 | Inappropriate |
| Start tacrolimus and discontinue steroids                                                                                                         | 1*  | 0.13  | 0.66 | Inappropriate |
| Start oral "MADoV" antibiotic combination alongside immunosuppressive therapy (metronidazole, amoxicillin, doxycycline, vancomycin or equivalent) | 5   | 0.39  | 1.80 | Uncertain     |
| Start oral "MADoV" antibiotic combination alone (metronidazole, amoxicillin, doxycycline, vancomycin or equivalent)                               | 2*  | 0.15  | 0.83 | Inappropriate |
| Colectomy                                                                                                                                         | 1.5 | 0.29  | 1.38 | Inappropriate |
| Discuss with COVID-19 specialist                                                                                                                  | 9   | 0.01  | 0.97 | Appropriate   |
| <b>Positive swab with symptoms or signs of COVID-19 infection</b>                                                                                 |     |       |      |               |
| Continue intravenous steroids alone                                                                                                               | 1   | 0.00  | 1.20 | Inappropriate |
| Start infliximab and continue steroids                                                                                                            | 8   | 0.01  | 1.03 | Appropriate   |
| Start infliximab and discontinue steroids                                                                                                         | 3   | 0.20  | 1.89 | Inappropriate |
| Start ciclosporin and continue steroids                                                                                                           | 4   | ◆1.04 | 2.69 | Uncertain     |
| Start ciclosporin and discontinue steroids                                                                                                        | 1   | 0.13  | 1.12 | Inappropriate |
| Start tacrolimus and continue steroids                                                                                                            | 1   | 0.13  | 1.18 | Inappropriate |
| Start tacrolimus and discontinue steroids                                                                                                         | 1*  | 0.13  | 0.48 | Inappropriate |

|                                                                                                                                                   |     |      |      |               |
|---------------------------------------------------------------------------------------------------------------------------------------------------|-----|------|------|---------------|
| Start oral "MADoV" antibiotic combination alongside immunosuppressive therapy (metronidazole, amoxicillin, doxycycline, vancomycin or equivalent) | 5   | 0.85 | 1.81 | Uncertain     |
| Start oral "MADoV" antibiotic combination alone (metronidazole, amoxicillin, doxycycline, vancomycin or equivalent)                               | 2   | 0.29 | 1.22 | Inappropriate |
| Colectomy                                                                                                                                         | 1   | 0.13 | 1.19 | Inappropriate |
| Discuss with COVID-19 specialist                                                                                                                  | 9*  | 0.00 | 0.38 | Appropriate   |
| <b>Continuing medical therapy</b>                                                                                                                 |     |      |      |               |
| <b>Negative swab and no symptoms or signs of COVID-19 infection</b>                                                                               |     |      |      |               |
| Follow standard ECCO/ESPGHAN guidelines for tapering oral steroids over 8-10 weeks                                                                | 8*  | 0.01 | 0.60 | Appropriate   |
| Use an accelerated steroid taper over 4-8 weeks                                                                                                   | 3   | 0.04 | 1.72 | Inappropriate |
| Switch to poorly absorbed bioavailable steroids                                                                                                   | 1*  | 0.01 | 0.78 | Inappropriate |
| Taper steroids and initiate thiopurine therapy at or soon after discharge                                                                         | 7.5 | 0.16 | 1.05 | Appropriate   |
| Taper steroids and initiate anti-TNF therapy at or soon after discharge                                                                           | 6   | 0.35 | 2.32 | Uncertain     |
| Taper steroids and initiate vedolizumab at or soon after discharge                                                                                | 3   | 0.29 | 2.22 | Inappropriate |
| Continue prophylactic anticoagulation for a period after discharge                                                                                | 3   | 0.26 | 1.85 | Inappropriate |
| <b>Positive swab but no symptoms or signs of COVID-19 infection</b>                                                                               |     |      |      |               |
| Follow standard ECCO/ESPGHAN guidelines for tapering oral steroids over 8-10 weeks                                                                | 8*  | 0.16 | 0.63 | Appropriate   |
| Use an accelerated steroid taper over 4-8 weeks                                                                                                   | 5.5 | 0.56 | 2.06 | Uncertain     |
| Switch to poorly absorbed bioavailable steroids                                                                                                   | 1*  | 0.13 | 0.78 | Inappropriate |
| Taper steroids and initiate thiopurine therapy at or soon after discharge                                                                         | 7   | 0.02 | 1.24 | Appropriate   |
| Taper steroids and initiate anti-TNF therapy at or soon after discharge                                                                           | 6   | 0.35 | 2.03 | Uncertain     |
| Taper steroids and initiate vedolizumab at or soon after discharge                                                                                | 4   | 0.65 | 2.03 | Uncertain     |
| Continue prophylactic anticoagulation for a period after discharge                                                                                | 3.5 | 0.57 | 2.25 | Uncertain     |
| <b>Positive swab with symptoms or signs of COVID-19 infection</b>                                                                                 |     |      |      |               |

|                                                                                                                                        |   |       |      |               |
|----------------------------------------------------------------------------------------------------------------------------------------|---|-------|------|---------------|
| Follow standard ECCO/ESPGHAN guidelines for tapering oral steroids over 8-10 weeks                                                     | 7 | 0.22  | 1.45 | Appropriate   |
| Use an accelerated steroid taper over 4-8 weeks                                                                                        | 6 | 0.24  | 2.03 | Uncertain     |
| Switch to poorly absorbed bioavailable steroids                                                                                        | 1 | 0.00  | 0.97 | Inappropriate |
| Taper steroids and initiate thiopurine therapy at or soon after discharge                                                              | 6 | 0.24  | 1.61 | Uncertain     |
| Taper steroids and initiate anti-TNF therapy at or soon after discharge                                                                | 6 | 0.52  | 2.10 | Uncertain     |
| Taper steroids and initiate vedolizumab at or soon after discharge                                                                     | 3 | 0.65  | 2.06 | Inappropriate |
| Continue prophylactic anticoagulation for a period after discharge                                                                     | 5 | ◆1.70 | 2.58 | Uncertain     |
| <b>Surgery</b>                                                                                                                         |   |       |      |               |
| In patients with a SARS-CoV-2 positive swab who have failed medical therapy, surgery should be delayed                                 | 3 | 0.69  | 2.48 | Inappropriate |
| Patients with a negative swab on admission should have a repeat swab                                                                   | 8 | 0.18  | 1.73 | Appropriate   |
| Patients should have a CT chest prior to surgery regardless of swab status, respiratory symptoms examination findings and observations | 7 | 0.16  | 1.21 | Appropriate   |
